# **PAG neurons encode a simplified action-selective signal during aggression**

Annegret L. Falkner<sup>1,2\*</sup>, Dongyu Wei<sup>4</sup>, Anjeli Song<sup>3</sup>, Li W. Watsek<sup>2</sup>, Irene Chen<sup>2</sup>, James E. Feng<sup>2</sup>, Dayu Lin<sup>2,4,5</sup>

<sup>1</sup> Princeton Neuroscience Institute, Princeton, NJ 08540, U.S.A

<sup>2</sup> Neuroscience Institute, New York University School of Medicine, New York, NY 10016, U.S.A.

<sup>3</sup> Boston University School of Medicine, Boston, MA 02118, U.S.A.

<sup>4</sup> Department of Psychiatry, New York University School of Medicine, New York, NY 10016, U.S.A.

<sup>5</sup> Center for Neural Science, New York University, New York, NY 10003, U.S.A.

\*Correspondence: [afalkner@princeton.edu](mailto:afalkner@princeton.edu)

## 1 **Summary**

2 While the ventromedial hypothalamus, ventrolateral area (VMHvl) is now well established as a  
3 critical locus for the generation of conspecific aggression, its role is complex, with populations of  
4 neurons responding during the motivational, sensory, and action phases of aggression, and also  
5 during social interactions with the opposite sex. It has been previously unclear how the brain  
6 uses this complex multidimensional signal and generates a discrete action: the attack. Here we  
7 find that the largest posterior target of the VMHvl, the lateral periaqueductal gray (IPAG)  
8 encodes a simplified attack-selective signal during aggression. Single units in the IPAG exhibit  
9 greater selectivity for the attack action during aggression than VMHvl neurons and a  
10 subpopulation of neurons in the PAG exhibit short-latency, time-locked spiking relative to the  
11 activity of jaw muscles for biting during attack. In addition, channelrhodopsin assisted circuit  
12 mapping reveals a preferential projection from VMHvl glutamatergic cells to IPAG glutamatergic  
13 cells. Using projection-specific fiber photometry, we find that this excitatory projection conveys  
14 male-biased signals from the VMHvl to downstream glutamatergic PAG neurons that integrate  
15 ongoing male-related activity over several seconds, which suggests that action-selectivity is  
16 generated by a combination of both pre and postsynaptic filtering mechanisms.

17

18 **Keywords:** Aggression, circuit, hypothalamus, periaqueductal gray, social behavior, jaw  
19 muscle

20

21 The VMHvl has emerged as a clearing house for socially relevant information,  
22 responding during attack, but also exhibiting increased activity during sensory investigation of  
23 males and females and during the preparatory phase prior to attack(Falkner et al. 2016, 2014;  
24 Remedios et al. 2017; Lin et al. 2011). In addition, suppression of VMHvl activity decreases not  
25 only the frequency of attack, but also investigatory, sexual, and aggression-seeking  
26 behaviors(Yang et al. 2013; Lee et al. 2014; Falkner et al. 2016). How then do neurons

27 downstream of the VMHvl interpret this complex code to drive aggression? Pharmacological  
28 manipulation of PAG circuits have been shown affect the efficacy of hypothalamic-mediated  
29 conspecific aggression, strongly indicating that the PAG's actions are downstream of the  
30 hypothalamus (Zalcman and Siegel 2006; Gregg and Siegel 2003), though its precise role in  
31 this transformation has remained unclear. The emerging role of the PAG in the expression of  
32 other innate behaviors, such as stimulus-induced flight, appears to be that of a split-second  
33 action (Evans et al. 2018; Wang et al. 2019). We reasoned that a parallel circuit in the PAG  
34 might perform a similar function during conspecific attack.

35 We reversibly suppressed the activity of the PAG during freely moving interactions with  
36 males and females using the GABA<sub>A</sub> agonist muscimol and tested whether inactivation altered  
37 conspecific social behaviors, including attack and investigation. We found that inactivation of  
38 the PAG produced action-specific deficits: we observed a decrease in time spent attacking a  
39 male intruder, but no effect in the time spent investigating either males or females (Fig 1A-B,  
40 Supplementary Movie 1). We observed a similar action-selectivity in the effects of muscimol on  
41 attack across alternative measures of behavior including mean duration of each behavior,  
42 latency to the first behavioral episode, number of behavioral episodes, and the total time spent  
43 engaging in each particular behavior (Supplementary Fig1). We did not observe a reduction of  
44 overall velocity during non-aggressive behaviors, suggesting that the effects of muscimol were  
45 not due to locomotor deficits (Supplementary Fig 1).

46 The specificity of this deficit during PAG inactivation indicates that the PAG's role within  
47 the aggression circuit is uniquely action-selective relative to the more complex role of the  
48 VMHvl. To confirm this, we recorded populations of single neurons in the IPAG during free  
49 interactions with males and females and compared the response profiles to newly quantified  
50 measures of previously recorded neurons from the VMHvl (Falkner et al. 2014; Lin et al.  
51 2011). We focused on the IPAG given the high amount of aggression-induced immediate early  
52 gene expression observed in our previous studies (Lin et al. 2011). Electrode tracks in all

53 animals were confirmed to be located in the IPAG post hoc using Dil (Fig 1C). We recorded  
54 from populations of neurons during freely moving interactions with males (10 minutes) and  
55 females (10 minutes) and examined the firing rates of single units aligned to attack,  
56 investigation of males, and investigation of females (Fig 1D-G). Across the population (n=164  
57 neurons, 6 animals), we observed that a subpopulation of neurons in the IPAG exhibited their  
58 peak firing aligned to the onset of attack while few neurons exhibited peak firing aligned to the  
59 onset of either investigation of male or female conspecifics (Fig 1E-G).

60 This selectivity for attack differs substantially from the response properties of the VMHvl.  
61 To directly compare these populations, we calculated the activity of each single unit in the  
62 VMHvl and IPAG to attack, investigate male, and investigate female. We observed that across  
63 the population, the VMHvl exhibits distinct activity peaks aligned to attack, investigation of  
64 males, and investigation of females (Fig 1H, top). In contrast, the population response at the  
65 PAG reveals an increase only during attack (Fig 1H, bottom). To compare the responses of  
66 single neurons in these populations, each neuron was assigned a responsivity score for each  
67 behavior (relative to its response during nonsocial behaviors). In addition, we determined the  
68 number of Bonferroni-corrected, significant neurons for each behavior in both VMHvl and IPAG  
69 populations (Fig 1I-J). We found that the population of IPAG neurons is significantly more  
70 attack-selective than investigate-selective, while the VMHvl population has equal responsive  
71 selectivity for both behaviors (Fig 1I). In addition, we found that IPAG exhibited an increased  
72 number of uniquely attack responsive neurons, and showed a decrease of both co-selective and  
73 investigate-selective single units relative to the VMHvl (Fig 1I,  $p=0.0031$ , chi-square test  
74 comparing numbers of attack responsive and investigate-responsive neurons between VMHvl  
75 and IPAG). Consistent with this, we also observed that the IPAG population shows little  
76 selectivity for either male or female investigation, and, relative to the VMHvl, has fewer neurons  
77 that respond to either or both of those behaviors (Fig 1J,  $p=0.0210$ , chi-square test comparing  
78 numbers of investigate-male-responsive and investigate-female-responsive neurons between

79 VMHvl and IPAG). Overall, we found that the selectivity for attack (compared to other social  
80 behaviors) was increased in the IPAG compared to the VMHvl and that the activity of attack  
81 selective neurons in the VMHvl increased earlier than attack selective neurons in the IPAG (Fig  
82 1K-L). Together these data are consistent with a role for the PAG in simplifying aggression-  
83 relevant signals from the VMHvl to drive attack.

84 To further explore the action selectivity of the IPAG during aggression, we examined the  
85 relationship between IPAG activity and an important effector for mouse aggression: the  
86 jaw. Using intramuscular injections of a retrogradely transported pseudorabies virus (PRV)  
87 (Smith et al. 2000), neurons in the PAG have been previously identified having polysynaptic  
88 projections to jaw muscles critical for aggressive behavior (Fay and Norgren 1997). We injected  
89 the superficial masseter muscle of the jaw (the critical muscle for jaw closure) with a GFP-  
90 labeled PRV 152 and found that the majority of retrogradely labeled neurons were located in the  
91 IPAG within the boundaries of the VMHvl excitatory terminal field (Supplementary Fig 2). We  
92 next tested whether these jaw projecting neurons were activated during aggressive encounters  
93 by examining the overlap between PRV-labeled GFP and the expression of an aggression-  
94 induced immediate early gene, c-Fos. We found that there were many c-Fos expressing  
95 neurons in the IPAG that were not GFP labeled, consistent with the idea that aggression may  
96 recruit many effector-specific pools of neurons. However, we also found that GFP-labeled  
97 neurons were far more likely than chance to also express attack-induced c-Fos (Fig. 2A-C),  
98 indicating that these jaw-projecting neurons in the IPAG likely play a role in aggression.

99 We hypothesized that neurons in the IPAG may have a specific role in coordinating  
100 attack-relevant musculature. Since the time course of immediate early gene expression is too  
101 slow to resolve the temporal relationship between activity of PAG neurons and muscle activity,  
102 we developed a preparation to simultaneously record from neurons in the IPAG and EMG  
103 activity from the superficial masseter (EMG<sub>SM</sub>) during interactions with males while animals are  
104 attacking and performing other social interactions (Fig 2D-E, Supplementary Video 2, n=64

105 neurons in 4 animals). We used mutual information (MI) to quantify whether the  $EMG_{SM}$  signal  
106 provides useful information in predicting the activity during male or female interactions. Mutual  
107 information provides a model-free method for capturing the amount of joint information between  
108 two signals, and increased mutual information indicates that one signal can be used to predict  
109 the other (Srivastava et al. 2017). We calculated MI for each neuron and associated  $EMG_{SM}$   
110 signal relative to a circularly permuted time shuffled control during interactions with males and  
111 females. We observed that across the population of recorded neurons,  $EMG_{SM}$  increased the  
112 MI during male interactions but not during female sessions relative to shuffle control and also  
113 that MI provided by the  $EMG_{SM}$  signal was significantly higher during male interactions compared  
114 to female interactions (Fig 2F), indicating that a subpopulation of neurons is modulated during  
115 attack-related jaw movement, but is not similarly activated by nonspecific jaw movements during  
116 female interactions.

117 We hypothesized that the activity of jaw-activated neurons might have a tight temporal  
118 relationship to the muscle activity if it is involved in directly activating the muscle. We examined  
119 the relationship between individual spikes and the  $EMG_{SM}$  signal. For each neuron, we  
120 generated a spike-triggered-EMG (STEMG) across an 800ms bin around each spike and used  
121 strict criteria to determine whether each STEMG demonstrated a significant relationship with  
122 individual spikes (Davidson et al. 2007). We found that a subpopulation of recorded neurons  
123 (21.8%, 14/64 neurons) showed a significantly increased STEMG within 60 ms of spikes during  
124 interactions with males ( $EMG_{sm+}$ , Fig 2G and I, black). Most but not all of these  $EMG_{sm+}$   
125 neurons (12/14) were activated during attack (Fig 2H and J, black). In addition, 9/64 neurons  
126 were identified as being significantly activated during attack but showed no increase in STEMG  
127 plot ( $EMG_{sm-}/Atk+$ , Fig 2I-J, red). Those  $EMG_{sm-}/Atk+$  neurons often exhibited suppression  
128 following PAG spiking (Fig 2I, red) and showed activation that persisted through the attack  
129 responses (Fig 2J, red). These response patterns differ from those of the  $EMG_{sm+}$  cells that  
130 were increased only at the onset of attack (Fig. 2J, black). These data are consistent with the

131 hypothesis that attack-related neurons in the IPAG may activate multiple attack related muscles,  
132 including jaw opening musculature. A smaller number of neurons (7.8%, 5/64 neurons)  
133 exhibited a time-locked relationship during female interactions, suggesting that some jaw  
134 responsive neurons may be recruited during other (nonaggressive) behaviors.

135         Though we did not explicitly test the activity of IPAG neurons during other nonsocial  
136 behaviors, we found that similar to the VMHvl, the population of recorded IPAG neurons  
137 exhibited decreased activity during spontaneous bouts of grooming and eating, indicating that  
138 non-aggressive jaw relevant actions do not similarly activate IPAG neurons (Supplementary  
139 Figure 3).

140         Our data demonstrates that neurons in the IPAG exhibit a greater degree of selectivity  
141 for aggressive action (i.e. attack) than neurons in the VMHvl. One simple mechanism by which  
142 this circuit could perform the transformation is if the projection from the VMHvl to PAG were a  
143 labeled line for aggression-specific information. To test this directly, first we explored whether  
144 excitatory projection neurons from the VMHvl form functional connections with neurons in the  
145 IPAG. We targeted excitatory projection neurons by injecting a red-shifted cre-dependent  
146 excitatory opsin (AAV2.Syn.Flex.ChrimsonR.tdTomato) into the VMHvl of vGlut2-ires-cre mice  
147 crossed with an Ai6 reporter. This strategy allowed us to record postsynaptic responses from  
148 vGlut2+ and vGlut2- neurons in the IPAG while optically manipulating the glutamatergic VMHvl-  
149 PAG projection (Fig. 3A-B). We first confirmed that brief light pulses at the VMHvl were  
150 sufficient to reliably evoke action potentials (Fig. 3C). Then, we made coronal slices of the IPAG  
151 and performed voltage clamp recording from putative vGlut2+ and vGlut2- neurons (identified by  
152 the presence and absence of GFP label) and tested whether a brief red light pulse activating the  
153 VMHvl-PAG terminals was sufficient to evoke postsynaptic responses (Fig. 3D-E). We found  
154 that approximately 50% (12/25) of identified vGlut2+ neurons exhibited short-latency excitatory  
155 post-synaptic currents (EPSCs) upon light delivery, while no single vGlut2- neurons (n =9)  
156 exhibited this excitatory response (Fig. 3F-G). Bath application of tetrodotoxin (TTX) and 4-

157 aminopyridine (4-AP) did not change the magnitude of light-evoked EPSCs, supporting the  
158 monosynaptic nature of the connection (Fig. 3H-I). None of the recorded cells showed inhibitory  
159 postsynaptic currents (IPSCs) upon light delivery.

160         Next, to explicitly test what information is being conveyed by this excitatory hypothalamic  
161 to midbrain projection, we targeted excitatory VMHvl-PAG projecting neurons, by injecting the  
162 ipsilateral side of a vglut2-ires-cre male mice with a retrogradely transported, cre-dependent,  
163 calcium indicator (HSV-Ef1a-LS1L-GCaMP6f) into the IPAG. On the contralateral side of the  
164 brain to the injection site, we also injected a cre-dependent calcium indicator  
165 (AAV1.CAG.Flex.GCaMP6f.WPRE.SV40) in the VMHvl in order to compare the activity from the  
166 total VMHvl vGlut2+ population, not specified by projection. We positioned fibers over both the  
167 ipsi and contralateral VMHvl and used fiber photometry to simultaneously record respectively  
168 from the VMHvl-PAG projection vGlut2+ neurons and the VMHvl general vGlut2+ population  
169 during interactions with males and females (Fig 3J-K). We alternated between brief  
170 presentations of a male mouse stimulus (~1 min) with a female mouse stimulus (~1 min) with a  
171 1 min break between presentations (Fig 3L) and compared the normalized activity between the  
172 VMHvl-PAG and VMHvl neuron populations across the entire set of interactions.

173         We found that both vGlut2+ VMHvl and VMHvl-PAG populations showed a strong bias  
174 towards male compared to female mean activity (Fig 3M-N). However, in a direct comparison of  
175 activity levels between VMHvl and VMHvl-PAG populations, we found that activity during male  
176 interaction was not significantly different between these simultaneously recorded populations  
177 (Fig 3O-P), while during female interactions, VMHvl-PAG activation decreased relative to the  
178 overall VMHvl population response. In addition, to track how well the two signals match, we  
179 computed the correlation (Pearson  $r$ ) between the simultaneously recorded population activity of  
180 VMHvl-PAG and VMHvl neurons and found that correlation coefficients during male interactions  
181 were significantly increased during male interactions relative to female interactions across



182 animals (Fig 3Q), indicating that the VMHvl-IPAG projection conveys a more faithful copy of  
183 population activity during male interactions than female interactions.

184 While we found that the VMHvl-PAG projection conveys male-biased information, we did  
185 not observe that this pathway conveys action-selective information during aggression  
186 (Supplementary Fig 4). To quantify this, we compared the PETHs of activity in the VMHvl  
187 vGlut2+ population and the VMHvl-PAG vGlut2+ projection during attack and investigation of  
188 males. We found that, similar to the single unit recording data, both VMHvl and VMHvl-PAG  
189 neurons also showed clear activation peaks aligned to both attack and investigation of males  
190 that were very strongly correlated at the level of the individual behavior episode (Supplementary  
191 Fig 4A-C).

192 Together these data demonstrate that an excitatory projection from the VMHvl to the  
193 IPAG conveys male-biased information to excitatory downstream populations, behaving as a  
194 labeled line for aggression-relevant information. While this labeled line projection effectively  
195 filters female-evoked signals, it does not filter non-attack signals during male interactions such  
196 as investigation. This suggests that further mechanisms are needed to transform VMHvl activity  
197 to an aggression-specific signal. One possibility is that the PAG is sensitive to slow temporal  
198 features in its inputs prior to activation during attack, including investigation-evoked increases  
199 that precede attack. To specifically model the interactions between the VMHvl and the PAG, we  
200 performed simultaneous recordings of glutamatergic population (vGlut2+) in both areas during  
201 free interactions with males and females (Fig. 3R-T). Qualitatively, we observed that during  
202 male interactions, PAG activity peaks often followed VMHvl activity peaks, while during female  
203 interactions, signal dynamics were more independent (Fig 3R-T, Supplementary Fig 4D-F). To  
204 quantify these interactions, we computed the cross correlation of the simultaneously recorded  
205 signals separately for male interactions, female interactions, and a baseline no-interaction  
206 epoch. We found that the cross correlation during male interactions was strongly and  
207 asymmetrically skewed across a multi-second timescale, indicating that increases in VMHvl

208 signals “lead” PAG signals during interactions with males, but not females (Fig. 3U-V). The  
209 integral of the cross correlation during the “pre” epoch (VMHvl leads PAG) relative to the “post”  
210 epoch (PAG leads VMHvl) significantly increased during male interactions across the population  
211 of recorded animals ( $n=7$ ,  $p=0.0174$ , paired t-test) and not significantly different during either the  
212 interactions with females or no-interaction baseline period ( $p=0.9333$ ,  $p=0.6148$ , paired t-test).

213 The slow temporal dynamics of the cross correlation during male interactions suggests  
214 that PAG activity is influenced by VMHvl activity stretching backwards in time for several  
215 seconds. To specifically quantify this temporal relationship between the VMHvl and IPAG, we  
216 modeled the ongoing PAG activity using a time-varying linear regressive model. We iteratively  
217 fit PAG activity with the activity of the VMHvl (VMHvl  $\rightarrow$  IPAG) with a family of models with a  
218 variable number of regressors representing increasing numbers of previous time bins, used  
219 Akaike Information Criteria (AIC) to select the best model within each family, and cross  
220 validated this model on a separate data set for each recorded animal. We performed this model  
221 selection separately for male and female interactions and across a variety of bin sizes, ranging  
222 from 50 ms to 1 s. We found that cross validated fits for the best fit model were significantly  
223 better during male but not for female interactions relative to a time shuffled control. Importantly,  
224 this effect was consistent across a range of bin sizes (Fig. 3W), indicating that this variable  
225 made little difference in the model fit. In addition, we extracted the model order (number of time  
226 bins) for the best fit model for each animal for male and female interactions for each bin size.  
227 We found that the elapsed time associated with these best fit models was significantly longer for  
228 male interactions than female interactions (Fig. 3W, right), indicating that during male  
229 interactions, PAG signals are influenced by VMHvl signals stretching farther back in time.

230 On a conceptual level, this suggests that activity in the VMHvl increases for several  
231 seconds prior to activation of the PAG, an effect consistent the action specificity of the PAG. As  
232 a control, we also fit the reverse circuit model, (IPAG  $\rightarrow$  VMHvl) and found that both the fits, and  
233 model order are significantly decreased relative with the forward circuit model during male, but

234 not female interactions (Supplementary Figure 5). Together, these results suggest a model by  
235 which during interactions with males, but not during interactions with females, the PAG receives  
236 VMHvl inputs conveying information about the sensory properties of the stimulus obtained  
237 during investigation, and this information is integrated over many seconds in order to drive  
238 attack behavior (Fig. 3X).

239         These findings provide evidence that the role of the PAG in the aggression circuit is to  
240 transform the complex sensory-motor and motivational signals of the hypothalamus into  
241 aggressive action and to coordinate the activation of effector-specific musculature, including the  
242 jaw. These results add to a growing literature that position the PAG as a critical initiator of innate  
243 behaviors that are determined by combinations of noisy sensory and state-dependent inputs  
244 (Koutsikou, Apps, and Lumb 2017). Since PAG neurons are active later and more acutely  
245 during attack behavior than its hypothalamic inputs from the VMHvl, it may serve as a  
246 behavioral initiation threshold, as has been suggested for other innate behaviors. We do not  
247 mean to suggest that the IPAG is “for” aggression: the PAG (and in particular hypothalamic to  
248 PAG pathways) have been implicated in many innate sensory-driven behaviors including but not  
249 limited to threat responsivity (Wang, Chen, and Lin 2015; Evans et al. 2018), prey capture(Li et  
250 al. 2018), itch(Gao et al. 2018), oro-motor coordination(Stanek et al. 2014), and social  
251 avoidance following defeat (Franklin et al. 2017). Additionally, the PAG has a well-documented  
252 role across species in the generation of vocalization, a behavior that also requires the  
253 integrations of social-sensory signals and the coordination of facial and laryngeal musculature  
254 (Kittelberger, Land, and Bass 2006; Holstege 2014). Here we add to this growing literature by  
255 elucidating the neural coding during conspecific attack and further hypothesize that the PAG is  
256 capable of orchestrating many complex innate behaviors by coordinating output to relevant  
257 muscles through sex-selective processing of slow temporal features in its inputs.

258

259

260 **Methods**

261

262 **Animals**

263 Experimental mice were sexually experienced, wild-type male C57BL/6N (12–24 weeks,  
264 Charles River), wild-type male Swiss Webster (12–24 weeks, Taconic), *vGlut2-ires-Cre* mice.  
265 Naïve *vGlut2* x *Ai6* mice were used for slice physiology and tracing experiments. Intruders were  
266 either group housed, sexually inexperienced BALB/c males or C57BL/6 females (both 10–30  
267 weeks). Mice were maintained on a reversed 12-h light/dark cycle (dark cycle starts at noon)  
268 and given food and water *ad libitum*. All procedures were approved by the IACUC of NYULMC  
269 in compliance with the NIH guidelines for the care and use of laboratory animals.

270

271 **Behavior analysis and tracking**

272 All freely moving behaviors were recorded using top and side GigE cameras using StreamPix  
273 (Norpix) and all videos were manually annotated for pre-identified behaviors and tracked for  
274 positional and velocity information using custom Matlab Software  
275 (<https://github.com/pdollar/toolbox>). Behaviors were manually classified as previously described  
276 (Falkner et al. 2014); individual behaviors included attack, investigation of males, investigation  
277 of females, mounting, eating, and grooming. All interactions were “resident intruder assay” (5-  
278 10 minutes of free interaction with male or female intruder), or alternating interactions with  
279 males and females (1 min each) separated by 1 min (Fig 3).

280

281 **Pharmacological Inactivation**

282 For all pharmacological inactivations, double cannulae were implanted 0.5 mm above IPAG  
283 (coordinates: -4.24mm,A-P, +/-0.5mm M-L, -1.85mm D-V) from and 0.2–0.3 µl of either saline or  
284 of 0.33 mg/ml muscimol (Sigma) in saline were injected into the PAG bilaterally through the

285 implanted double cannulae on alternating days. 8/11 animals were injected with fluorescent-  
286 conjugated muscimol (0.5 mg/ml) prior to perfusion to confirm injection coordinates and injection  
287 volume spread.

288

### 289 ***Extracellular recording of freely moving mice***

290 Methods for physiological recording in freely moving animals were described previously.  
291 Custom-built 16-channel (or 14 channel with EMG) tungsten electrode bundles or groups of  
292 tetrodes were attached to a moveable microdrive and implanted over the IPAG. After allowing 2  
293 weeks for recovery, we connected the implanted electrode to a 16-channel headstage. Signals  
294 were streamed into a commercial acquisition system through a torqueless, feedback-controlled  
295 commutator (Tucker Davis Technology) and band-pass filtered between 100 and 5,000 Hz.  
296 Digital infrared videos of animal behavior from both side- and top-view cameras were  
297 simultaneously recorded at 640×480 pixel resolution at 25 frames per second (Streampix,  
298 Norpix). Video frame acquisition was triggered by a TTL pulse from the acquisition system to  
299 achieve synchronization between the video and the electrophysiological recording. Spikes were  
300 sorted manually using commercial software (OfflineSorter, Plexon) based on principal  
301 component analysis. Unit isolation was verified using autocorrelation histograms. To consider  
302 the recorded cell as a single unit, cells had to have a signal/noise ratio >2; spike shape had to  
303 be stable throughout the recording; and the percentage of spikes occurring with inter-spike  
304 intervals (ISIs) <3 ms (the typical refractory period for a neuron) in a continuous recording  
305 sequence had to be <0.1%. We checked for redundancies within days by examining the cross  
306 correlations of co-recorded neurons and checked for redundancies across days by comparing  
307 waveforms and temporal response profiles. After the first recording, the implanted electrode  
308 was slowly moved down in 40-µm increments. The placement of the electrode was examined  
309 histologically with the aid of Dil coated on the electrodes. Animals were excluded if electrodes

310 were not confined to the PAG. Recordings of the VMHvl (Fig 1H-L) were performed previously  
311 using identical methods (Falkner et al. 2014; Lin et al. 2011) and reanalyzed here for direct  
312 comparison to PAG neurons.

313

### 314 ***Electrophysiology Analysis***

315 Spikes in single neurons were convolved with a 25 ms Gaussian for presentation (Fig  
316 1D). Responsivity index for each behavior (Fig 1i-j) was computed as

$$317 \frac{(\text{Activity}_{\text{behavior}} - \text{Activity}_{\text{baseline-nonsocial}})}{(\text{Activity}_{\text{behavior}} + \text{Activity}_{\text{baseline-nonsocial}})}$$

318 Where  $\text{Activity}_{\text{behavior}}$  is defined as the mean activity across all episodes of a particular behavior  
319 (e.g. attack) and  $\text{Activity}_{\text{baseline-nonsocial}}$  is defined as the mean activity across all episodes designated  
320 as non-social within the given social interaction. Within-neuron significance was determined  
321 using a paired t-test for each neuron (behavior vs. nonsocial) compared to a Bonferroni-  
322 corrected threshold for each tested population.

323

### 324 ***PRV injections***

325 The right masseter was exposed and PRV-152 (kind gift from Lynne Enquist), was injected at 5  
326 separate locations, 250uL per injection along the A-P axis of the muscle. The skin was sutured  
327 closed and PRV was incubated for 96-112 hrs prior to sacrifice. In some cases, animals were  
328 allowed to freely interact with a male mouse for 10 min 1 hour prior to sacrifice at the 96 hr time  
329 point post-PRV injection. These animals were stained for c-Fos (primary antibody: goat anti-  
330 Fos, Santa Cruz, sc-52G, 1:300, secondary antibody: donkey anti-goat Dylight 549, Jackson  
331 Immuno, 705-505-147, 1:300).

332

### 333 ***EMG implantation and recording***

334 To perform simultaneous recordings of PAG neurons and jaw muscle activity, we implanted  
335 animals with chronic EMG electrodes in the right masseter superficial muscles of the  
336 jaw. Electrodes were constructed using a pair of 0.001 inch flexible multi-strand stainless steel  
337 wires (A-M Systems, No. 793200) with the insulation removed from a 0.5-mm segment of each  
338 wire such that pairs of electrodes recorded signals from separate but nearby areas of the same  
339 muscle. Electrode wires were threaded through the muscle during a surgical procedure and  
340 anchored with a knot on the outside of the muscle. EMG wires were then threaded under the  
341 skin to the base of the skull where they were attached to ground electrodes. EMG wire output  
342 was relayed through a preamplifier and commutator to the digitizer with a sampling rate of 3,000  
343 Hz (Tucker Davis Technology). Signals were processed by taking the difference from the pair of  
344 electrodes, and this differential signal was low pass filtered at 300 Hz.

345

#### 346 ***EMG analysis***

##### 347 *Mutual Information*

348 Mutual information was computed between simultaneously recorded PAG activity and jaw  
349 EMG. EMG signals were rectified, low pass filtered at 20Hz, and downsampled to 1kHz. Spike  
350 trains were converted into a continuous instantaneous firing rate (IFR) with the same number of  
351 points as the downsampled EMG signals. For each pair of recorded PAG instantaneous firing  
352 rate and EMG signal, the continuous signals were discretized and MI was computed according  
353 to the definition(Shannon and Weaver 1964; Schilling, n.d.; Timme and Lapish 2018):

$$354 MI(X;Y)=\sum_{x,y}P_{XY}(x,y)\log\frac{P_{XY}(x,y)}{P_X(x)P_Y(y)}=E_{P_{XY}}\log\frac{P_{XY}}{P_XP_Y}$$

355 Where x and y represent the instantaneous firing rate and EMG signal respectively.

356 For each signal pair, the MI was compared relative to the mean of ten iterations of a  
357 circularly permuted time shuffled control.

##### 358 *Spike Triggered EMG*

359 STEMGs were computed on rectified EMG signals by averaging the EMG signal in an 800ms  
360 window around each PAG spike recorded during interactions with a male or with a  
361 female. STEMGs were computed separately for each 10s increment during male and female  
362 interactions, smoothed with a 5ms moving average, then normalized by the number of spikes.  
363 To correct for drift due to volleys of successive spikes, STEMGs were baseline corrected by  
364 subtracting a baseline 100ms boxcar filtered version of the STEMG. To determine whether  
365 STEMGs contained significant peaks, we set strict criteria: STEMGs had to have a minimum of  
366 5 consecutive points that crossed above the 98% confidence interval within 60ms of the 0 (the  
367 spike onset).

368

### 369 ***In vitro* electrophysiological recordings**

370 Vglut2:Cre x Ai6 mice were injected with 100 nL rAAV2.syn.flex.ChrimsonR.tdT into VMHvl. Three  
371 weeks after virus injection, acute horizontal brain slices of VMHvl and PAG (275  $\mu$ m in thickness)  
372 were collected using standard methods (Fang et al. 2018). After being anesthetized by isoflurane  
373 inhalation, the mice were perfused by ice-cold choline based cutting solution containing (in mM)  
374 25 NaHCO<sub>3</sub>, 25 glucose, 1.25 NaH<sub>2</sub>PO<sub>4</sub>, 7 MgCl<sub>2</sub>, 2.5 KCl, 0.5 CaCl<sub>2</sub>, 110 choline chloride, 11.6  
375 ascorbic acid, and 3.1 pyruvic acid. The slices were collected in the same cutting solution using  
376 a Leica VT1200s vibratome, incubated for 20 min in oxygenated artificial cerebrospinal fluid  
377 (ACSF) solution (in mM: 125 NaCl, 2.5 KCl, 1.25 NaH<sub>2</sub>PO<sub>4</sub>, 25 NaHCO<sub>3</sub>, 1 MgCl<sub>2</sub>, 2 CaCl<sub>2</sub> and  
378 11 glucose) (osmolality, 295 mmol/kg) at 32– 34°C and then maintained at room temperature until  
379 use. Standard whole cell recordings were performed with MultiClamp 700B amplifier (Molecular  
380 Devices) and Clampex 11.0 software (Axon Instruments). Membrane currents were low-pass



381 filtered at 2 kHz and digitized at 10 kHz with Digidata 1550B (Axon Instruments). Electrode  
382 resistances were 2–4 M $\Omega$ , and most neurons had series resistance from 4 to 15 M $\Omega$ .  
383 Glutamatergic (green fluorescent) or GABAergic (non-fluorescent) cells as well as Chrimson-  
384 tdTomato expressed VMHvl cells were identified with an Olympus 40 x water-immersion objective  
385 with GFP and TXRED filters. The slices were superfused with ACSF warmed to 32– 34°C and  
386 bubbled with 95% O<sub>2</sub> and 5% CO<sub>2</sub>. The intracellular solutions for voltage clamp recording  
387 contained (in mM) 135 CsMeSO<sub>3</sub>, 10 HEPES, 1 EGTA, 3.3 QX-314 (Cl<sup>-</sup> salt), 4 Mg-ATP, 0.3 Na-  
388 GTP, and 8 Na<sub>2</sub>-Phosphocreatine (osmolality, 295 mmol/kg; pH 7.3 adjusted with CsOH), and for  
389 current clamp recording contained (in mM) 130 K MeSO<sub>3</sub>, 5 KCl, 0.5 EGTA, 20 HEPES, 1.8 MgCl<sub>2</sub>,  
390 0.1 CaCl<sub>2</sub>, 4 Na<sub>2</sub>-ATP, and 0.2 Na-GTP (osmolality, 295 mmol/kg; pH 7.3 adjusted with KOH). To  
391 activate Chrimson-expressing VMHvl glutamatergic neurons and Chrimson-expression axons in  
392 PAG, brief pulses of full field illumination (20 ms for VMHvl during current clamp recording and 1  
393 ms duration for PAG during voltage clamp recording) were delivered onto the recorded neuron  
394 with 605 nm LED light (pE-300white; CoolLED) at 35 s intervals. Voltage clamp recording was  
395 conducted for PAG neurons, and the membrane voltage was held at -70 mV for EPSC recording,  
396 and at 0 mV for IPSC recording. Current clamp recording was conducted in VMHvl glutamatergic  
397 neurons expressing Chrimson-tdTomato, where the neurons were maintained at resting potential  
398 and spiking activity was detected with or without red light pulses (20 ms, 20 Hz for 500 ms).

399

#### 400 ***Fiber photometry recordings***

401 A rig for performing simultaneous fiber photometry recordings from 2 locations was constructed  
402 following basic specifications previously described with a few modifications. For simultaneous  
403 VMH and VMHvl-PAG recordings, we injected vGlut2-ires-cre males with 100-160nl of  
404 AAV1.CAG.Flex.GCaMP6f.WPRE.SV40 (Lot CS0956, CS0845, CS0224WL, Upenn, final titer::  
405  $9.3 \times 10^{12}$  PFU/ml) ipsilaterally into the VMHvl, and 240nl of HSV-Ef1a-LS1L-GCaMP6f (MIT  
406 vector core, Lot RN506, final titer:  $1.0 \times 10^9$  PFU/ml) contralaterally in the PAG. For  
407 simultaneous recordings of the VMHvl and IPAG, we injected 80-120nl of AAV2/1 CAG::Flex-  
408 GCaMP6f-WPRE-SV40 ipsilaterally into the VMHvl, and 160-240nl of AAV2/1 CAG::Flex-  
409 GCaMP6f-WPRE-SV40 in the IPAG. Viruses were injected using the following  
410 coordinates: VMHvl (-1.82A/P, 0.72M/L, -5.8D/V), IPAG(-3.64A/P, 0.5M/L-2.4D/V).  
411 A 400- $\mu$ m optic fiber (Thorlabs, BFH48-400) housed in a metal ferrule (Thorlabs, SFLC440-10)  
412 was implanted 0.4 mm above each injection site, except for the HSV-Ef1a-LS1L-GCaMP6f  
413 injection, where the fiber was placed over the VMHvl. After three weeks of viral incubation and  
414 before recording, a matching optic fiber was connected to the each implanted fiber using a  
415 ferrule sleeve. A 400-Hz sinusoidal blue LED light (30-50  $\mu$ W) (LED light: M470F1; LED driver:  
416 LEDD1B; both from Thorlabs) was bandpass filtered (passing band:  $472 \pm 15$  nm, Semrock,  
417 FF02-472/30-25) and delivered to the brain to excite GCaMP6. The emission light then traveled  
418 through the same optic fiber, was bandpass filtered (passing band:  $534 \pm 25$  nm, Semrock,  
419 FF01-535/50), detected by a femtowatt silicon photoreceiver (Newport, 2151) and recorded  
420 using a real-time processor (RZ5, TDT). The envelope of the 400-Hz signals that reflects the  
421 intensity of the GCaMP6 signals were extracted in real-time using a custom TDT program.  
422 Baseline adjusted fluorescence signals were regressed using a 30s spline approximation.

423

## 424 **Histology and imaging**

425 Animals were deeply anaesthetized using 0.5 ml of a ketamine-xylazine cocktail (10 mg/ml  
426 ketamine and 5 mg/ml xylazine) and transcardially perfused with phosphate buffered saline  
427 (PBS) followed by cold 4% paraformaldehyde in PBS. Brains were immersed overnight in a 20%  
428 sucrose solution, embedded with cutting medium (Tissue-Tek) and sectioned using a cryostat  
429 (Leica). Standard immunohistochemistry procedures were followed to stain 30- $\mu$ m coronal brain  
430 sections for all mice. DAPI (1:20,000, Life Technologies, catalog number D21490, widely  
431 validated) was used to assess electrode track for physiology and fiber track for photometry. We  
432 acquired 2.5 $\times$  or 5 $\times$  fluorescent images to determine cannula or electrode placements. We used  
433 10 $\times$  fluorescent images to count c-Fos+ and PRV+. Cell counting was done manually using  
434 ImageJ on 30- $\mu$ m sections separated by 60  $\mu$ m that had observed GFP label in the IPAG.

435

#### 436 **Time-varying linear regression model**

437 We modeled the population response of the PAG during male and female interactions for each  
438 animal by fitting the PAG response during each interaction including 10s prior to the introduction  
439 and 10s following the removal of the animals with a series of autoregressive models using time-  
440 varying lengths of simultaneously recorded VMHvl signal as the variable regressors using the  
441 form:

$$442 \text{ PAG}(t) = a_1 \cdot \text{VMHvl}(t) + a_2 \cdot \text{VMHvl}(t-1) + a_3 \cdot \text{VMHvl}(t-2) + \dots + a_n \cdot \text{VMHvl}(t-n)$$

443 where t represents the current time bin and the other regressors represent variable amounts of  
444 elapsed time. PAG and VMHvl signals were binned in either 50ms, 100ms, 250ms, 500ms, and  
445 1s bins and models were fit independently for each of these bin sizes. For each VMHvl and  
446 PAG signal, data was halved and the first half was used to fit and the second half was used to  
447 cross validate, using least squares. Model order was set to maximum value of 10s of elapsed  
448 time, set independently for each bin size. For each family of models fit to the data, the best  
449 order model was determined using AIC (Akaike Information Criteria) on the fit to the cross  
450 validated data. A timeshifted null model was fit by circularly permuting the input data (VMHvl)

451 signal and fitting the unpermuted PAG signal, and fit and model order were re-fit for the  
452 timeshifted data. Model order for the selected model was converted to elapsed time for each  
453 binsize. Fits were performed separately for male and female interactions. Additionally, we  
454 tested the alternative hypothesis that PAG signals influence VMHvl signal by fitting the “reverse”  
455 model of the form:

$$456 \quad \text{VMH}(t) = a_1 \cdot \text{PAG}(t) + a_2 \cdot \text{PAG}(t-1) + a_3 \cdot \text{PAG}(t-2) + \dots + a_n \cdot \text{PAG}(t-n)$$

457 A similar model family was fit for the reverse model, and the model order (and elapsed time)  
458 was determined for each model independently for each bin size.

## 459 **Statistical Analysis**

461 Parametric tests, including Student’s *t*-test, paired *t*-test, and two-sample *t* test were used if  
462 distributions passed Kolmogorov–Smirnov tests for normality. For within-neuron tests of firing  
463 rate significance, a non-parametric Wilcoxon signed rank test was used since spike rates were  
464 often low and not normally distributed. Repeated tests of significance were corrected with a  
465 strict Bonferroni correction. For all statistical tests, significance was measured against an alpha  
466 value of 0.05 unless otherwise stated. All error bars show s.e.m. No statistical methods were  
467 used to predetermine sample sizes, but our sample sizes are similar to those reported in  
468 previous publications. Data collection and analysis were not performed blind to the conditions  
469 of the experiments.

470 Statistical analyses used in each figure are listed below.

471 Figure 1. (B) Single factor, repeated measures ANOVA. (D) Single neuron activity average  
472 using 25ms Gaussian smoothing (E-G) Top panels are the z-scored responses of individual  
473 neurons aligned to each behavior, and histograms represent the number of neurons whose  
474 peak response lies at that bin relative to behavior onset. Dotted line represents chance level  
475 (number of bins/number of neurons). (I-J) Wilcoxon signed rank test for comparison of  
476 population response. Percentages of neurons in pie charts computed using within-neuron

477 significance test across one or both behaviors, with Bonferroni correction. (K) Kolmogorov-  
478 Smirnov test (L) Unpaired ttest across all bins using Bonferroni corrected threshold across all  
479 bins.  
480 Figure 2. (C) Paired t-test, (f) Kolmogorov-Smirnov test between cumulative distributions. (G)  
481 Significant EMGsm+ neurons see methods.  
482 Figure 3. (F) Fisher's test, (H) paired t-test, (M-Q) Error bars show +/-SEM, comparisons of  
483 means with paired t-test. (U) Error bars show +/-SEM (V) Wilcoxon signed rank test of male,  
484 female, and baseline activity. (W) Paired t-test between forward and null model at each bin for  
485 fit, Paired t-test between male and female interactions for model time.  
486 Supplementary Figure 1. (A-F) Paired t-test.  
487 Supplementary Figure 2. (C) Paired t-test.  
488 Supplementary Figure 3. (A-C) Wilcoxon signed rank test.  
489 Supplementary Figure 4. (A-B,D-E) Activity shown is z-scored across the whole interaction  
490 trace. (C,F) Activity for each individual behavior is baseline subtracted using a 1s bin 5s prior to  
491 interaction. Individual behaviors compared using student's ttest, and comparison between  
492 behaviors using an unpaired t-test.  
493 Supplementary Figure 5. (A-B) Paired t-test between forward and reverse model at each bin.  
494  
495  
496

## 497 **Figure Legends**

498

499 Figure 1. IPAG is more attack selective than the VMHvl. We recorded the behaviors during  
500 freely moving social interactions with males and females during reversible inactivation (A-B) and  
501 single unit recording (C-G). (B) Reversible inactivation of PAG using alternating injections of  
502 saline and muscimol induced selective deficits on attack and no change in investigatory  
503 behaviors (N = 11, \*p=0.0134 for attack, left; p=0.985 for investigate male, middle; p=0.896 for  
504 investigate female, one-way repeated measures ANOVA). (C) Histology showing example  
505 placement of electrode bundle in the IPAG and electrode track locations for all recording  
506 animals (N=6). (D) Example raster plot (top) and PETH (bottom) for activity of an example IPAG  
507 units aligned to attack (red), investigation of a male (blue), and investigation of a female  
508 (green). (E-G) Normalized responses of population (top) of recorded neurons sorted by peak of  
509 response aligned to attack (E, N = 159), investigation of male (F, N = 158), and investigation of  
510 female (G, N = 151). Bottom histograms show number of units with response peak above 95%  
511 CI in each bin. Dotted black lines (E-G) represent chance levels for each behavior. (H)  
512 Normalized population response mean  $\pm$ SEM of VMHvl (top) and IPAG (bottom) during onsets  
513 of key behaviors interactions with males: attack (red) and investigate male (blue), and with  
514 females: investigate female (green). (N = 166,156 for VMHvl male attack and investigate,  
515 N=212 for female investigate, N = 159 for IPAG male attack and investigate, N=151 for female  
516 investigate). Comparison of responsivity of individual VMHvl neurons (I-J top, light gray) and  
517 IPAG neurons (I-J bottom, dark gray). VMHvl population is nonselective between attack and  
518 investigate male (I, top, p=0.806, N = 157), and selective for investigation of male compared to  
519 female (J, top,p=0.005, N=147), while IPAG is selective for attack relative to investigate male (I,  
520 bottom, p=3.4x10<sup>-7</sup>, N=152), and nonselective for investigation of males and females (J,  
521 bottom, p=0.415, N=152). Tests in I-J performed using Wilcoxon signed-rank test. Pie chart  
522 insets displaying percentages of individually significant neurons (Bonferroni-corrected t-test) in

523 VMHvl and IPAG show an increasing number of purely attack selective neurons in the IPAG  
524 relative to VMHvl and a decrease of investigation selective neurons in the IPAG. (K) Selectivity  
525 of population to attack compared to selectivity to investigate male shows that attack-shifted  
526 peak for IPAG population (dark gray) relative to VMHvl (light gray).  $P=0.0001$ , Kolmogorev  
527 Smirnov test. (L) Attack responsive neurons in the VMHvl (light gray) have significantly  
528 increased activity prior to attack onset relative to attack responsive IPAG neurons (dark  
529 gray).  $N=44$  neurons in VMHvl  $N=46$  neurons, IPAG,  $p=0.0005$ , Bonferroni corrected  
530 unpaired ttest across all bins.

531  
532 Figure 2. IPAG spiking has precise temporal alignment with jaw muscle activity during  
533 aggression. (A) Experimental design for injections of PRV-152 into the superficial masseter of  
534 the jaw, followed by 10min aggressive interaction for c-Fos induction after 96 hrs of viral  
535 incubation. (B) Example histology showing GFP labeling in the IPAG is co-localized with  
536 aggression-induced c-Fos. Panels show insets (white box) of c-Fos (mCherry, left top), PRV-  
537 GFP (left center), and merge (left bottom) with arrows indicating neurons with overlap. (C)  
538 PRV-GFP labeled cells show preferential overlap with aggression-induced c-Fos ( $p=0.009$ ,  $N=$   
539  $3$ , paired t-test). (D) Example simultaneous recordings of jaw EMG and IPAG spiking during  
540 attack episodes. (E) Example EMG (top) and activity from simultaneously IPAG neuron  
541 (bottom) during interaction with a male (F) Mutual information (MI) of IPAG spiking and EMG  
542 activity comparing during interactions with males and females ( $N=64$  neurons). MI of activity  
543 during male interaction compared to time shuffled control ( $p=0.0214$ , paired t-test), MI of activity  
544 during female interactions to time shuffled control ( $p=0.1551$ , paired t-test), MI of activity during  
545 male and female interactions ( $p=0.0053$ , paired t-test). Example STEMG (G) and attack-aligned  
546 PETH (H) with precise temporal alignment to EMG. (I-J) STEMG (I) and attack aligned activity  
547 (J) of neurons with significant STEMG (red, top trace), and significant attack responsive neurons  
548 that are do not have significant STEMG (black, bottom trace), show distinct dynamics.

549  
550 Figure 3. An excitatory VMHvl-IPAG projection filters aggression-relevant information using pre  
551 and post-synaptic mechanisms. (A) Viral strategy for targeting excitatory projections from  
552 VMHvl to IPAG using vGlut2-ires-cre x Ai6 mice. Slices were made of VMHvl and IPAG and  
553 whole cell recordings were performed. (B) Representative infrared differential interface contrast  
554 image (IR-DIC) from a recorded slice containing VMHvl (top, left) and IPAG (bottom, left).  
555 Yellow arrows indicate locations of recording pipette tips. Scale bar 500  $\mu$ m. (right) Coronal  
556 section (right) showing expression of Chrimson-tdTomato (red) from a vGlut2 x Ai6 mouse.  
557 Scale bar 1mm. (C) Example trace showing current clamp recording of a VMHvl glutamatergic  
558 neuron expressing Chrimson-tdTomato. 605 nm light pulses (20 Hz, 20 ms for 500 ms, red  
559 ticks) reliably evoked time-locked spiking. Scale bars: 100 ms (horizontal) and 10 mV (vertical).  
560 (D) Histological image showing distribution of glutamatergic cells (green) and Chrimson-  
561 tdTomato expressing fibers from the VMHvl (red) in the PAG. Blue: Topro-3. Scale bar, 200  $\mu$ m.  
562 (E) Enlarged views from (D) showing biocytin-filled vGlut2 negative (top row) and positive cells  
563 (bottom row) and their corresponding recording traces showing 1ms 605 nm light evoked EPSC  
564 (-70 mV) and IPSC (0 mV). Yellow arrows indicate the locations of the biocytin filled cells. Scale  
565 bar (left), 20  $\mu$ m. Scale bars (right): 100 ms (horizontal) and 10 pA (vertical). (F) Stacked bar  
566 graphs showing the percentage of recorded PAG cells receiving EPSC during light stimulation.  
567 12 out of 25 PAG vGlut2+ neurons received glutamatergic input from VMHvl, none showed light  
568 evoked IPSC; none of 9 vGlut2- neurons showed any light evoked responses. Fisher's test. \* $p <$   
569 0.05. (G) Light-evoked EPSC amplitude (left) and latency (right) in PAG glutamatergic neurons  
570 (n=12). Error bars show means  $\pm$  SEM. (H) Example traces showing 1ms 605 nm light evoked  
571 EPSC before (black) and after 1  $\mu$ M TTX and 100  $\mu$ M 4AP perfusion (red) in PAG glutamatergic  
572 neurons. Scale bars: 100 ms (horizontal) and 10 pA (vertical). (I) No change in light-evoked  
573 EPSC amplitude before and after 1  $\mu$ M TTX and 100  $\mu$ M 4AP perfusion in PAG glutamatergic  
574 neurons (n=6). Paired t-test.  $p >$  0.05. (J) Experimental configuration of bilateral injection of



575 Cre-dependent GCaMP6f into Vglut2-ires-Cre mice for simultaneous fiber photometry  
576 recordings of VMHvl and VMHvl-PAG projection neurons. Ipsilateral injection targets vGlut2+  
577 VMHvl neurons and the contralateral injection targets vGlut2+ VMHvl-PAG projection neurons.  
578 (K) Example histology of GCaMP-labeled vGlut2+ VMHvl neurons (right) and Vglut2+ VMHvl-  
579 IPAG neurons (left) and placement of fiber tracks. (L) Example simultaneous recording of  
580 vGlut2+ VMHvl (black) and VMHvl-PAG (magenta) projection neurons during alternating  
581 interactions with males (blue) and females (red). (M-N) Population activity (mean +SEM for  
582 each animal, N=6 animals) of comparison between activity during male interaction and female  
583 interaction for VMHvl neurons (M,  $p=0.0062$ ) and for VMHvl-PAG projection neurons (N,  
584  $p=0.0002$ ), shows that both populations exhibit increased activity to males. (O-P) Comparison of  
585 simultaneously recorded activity VMHvl and VMHvl-PAG neurons is not significantly different  
586 during male interactions (O,  $p=0.3676$ ), but activity during female interaction is reduced in  
587 VMHvl-PAG neurons (P,  $p=0.044$ ). (Q) Correlation of simultaneously recorded VMHvl and  
588 VMHvl-PAG neurons is higher in male interactions than female interactions ( $p=0.0238$ ). All  
589 tests (M-Q) using paired t-test. (R) Experimental configuration of simultaneous recording of  
590 vGlut2+ populations in the VMHvl and IPAG. VMHvl and IPAG were recorded during  
591 interactions with males (S) and females (T). (U) Cross correlation of simultaneously recorded  
592 signals during male interactions (blue), female interactions (red) and no-interaction baseline  
593 (black). (V) Comparison of summed cross correlation in pre epoch (-10s to 0s) and post epoch  
594 (0s to 10s) for male, female, and no-interaction baseline shows significant asymmetry only  
595 during male interaction (N=7 animals, male  $p=0.0174^*$ , female  $p=0.9333$ , baseline  
596  $p=0.6148$ ). (W) PAG activity was fit with a linear model using a variable amount of preceding  
597 VMHvl signal as the regressors. Fit percent (middle) and time (right) associated with best fit  
598 models of cross-validated data using a time-varying input from VMHvl. Dotted lines represent  
599 data from time shuffled controls. (X) Conceptual model of pathway selectivity of male-  
600 responsive information.

601

602 Supplementary Figure 1.

603 Alternative measures of behavior, including behavior duration, latency to first behavior, number  
604 of behavior episodes, and total time spent engaging the behavior confirm reduction of  
605 aggression. Behaviors shown are attack (A, \*\* $p=0.00284$ , \* $p=0.0121$ , \*\* $p=0.0090$ , \*\* $p=.00689$ ),  
606 investigation of male (B,  $p=0.7344$ ,  $p=0.8617$ ,  $p=0.8091$ ,  $p=0.8719$ ), investigation of females (C,  
607  $p=0.6784$ ,  $p=0.4077$ ,  $p=0.2029$ ,  $p=0.1322$ ), and mounting behavior (D,  $p=0.1490$ , \*\* $p=0.0036$ ,  
608  $p=0.3830$ ,  $p=0.2329$ ). Mean saline shown in light bars, muscimol shown in dark bars.

609 Reversible inactivation during male interaction reduces mean resident velocity (E), but effects  
610 are eliminated when episodes of attack are removed from analysis (E, right inset). Inactivation  
611 during female interaction has no effect on resident velocity (F). (N=11 animals for all  
612 comparisons, \* $p<0.05$ , \*\* $p<0.01$ , \*\*\* $p<0.001$ , ns=nonsignificant, paired ttest).

613

614 Supplementary Figure 2. PRV-labeled jaw-projecting neurons are maximally within VMHvl-  
615 projection-defined column boundaries. (A) Experimental procedure for determining overlap  
616 between VMHvl projection fields and PRV label. (B) Example histology showing VMHvl  
617 synaptophysin-containing terminals (left), PRV-GFP labeled jaw-projecting neurons (center),  
618 and overlap (right). (C) Number of GFP labeled neuron observed within each PAG column. N=4  
619 animals,  $p=0.0028$ , one-way ANOVA (D) Putative circuit from excitatory vGlut2+ neurons to jaw.

620

621 Supplementary Figure 3. Other jaw-related behaviors decrease IPAG activity. (A-B) Activity  
622 during eating is significantly decreased relative to attack (A, N=26,  $p=0.0007$ ), and nonsocial  
623 epochs (B, N=26,  $p=0.0006$ ). Gray dots represent single neurons tested in both behaviors. (C)  
624 Activity during grooming is decreased relative to nonsocial epochs (N=87,  $p=0.004$ ). (D)  
625 Neurons with significant STEMG activity do not show activity increases aligned eating or

626 grooming onsets, but do show activity aligned to attack. All pairwise comparisons done with  
627 Wilcoxon signed rank test.

628  
629 Supplementary Figure 4. Fiber photometry responses to individual male behaviors during  
630 simultaneous recordings. (A-B) PETHs comparing simultaneously recorded mean VMHvl  
631 (black) and VMHvl-IPAG (magenta) aligned to attack (A) and investigate male (B) N=6  
632 animals. (C) Comparison of individual behavior episodes for attack (red) and investigate male  
633 (blue). Both attack and investigate male acutely increase VMHvl and VMHvl-IPAG responses  
634 ( $***p=9.2157*10^{-13}$ ,  $***p=1.3144*10^{-6}$ , N=84 attack episodes in 6 animals;  $***p=1.8445*10^{-7}$ ,  
635  $***p=2.6243*10^{-7}$ , N=85 investigate male episodes in 6 animals, one sample  
636 ttest; Comparison between behaviors, VMHvl:  $***p=5.157*10^{-4}$ , VMHvl-IPAG:  $p=0.4201$ ). (D-  
637 E) PETHs comparing simultaneously recorded mean VMHvl (black) and IPAG (magenta)  
638 aligned to attack (D) and investigate male (E) N=7 animals. (F) Comparison of individual  
639 behavior episodes for attack (red) and investigate male (blue). Attack acutely increases VMHvl  
640 and IPAG ( $***p=2.9198*10^{-11}$ ,  $***p=4.0921*10^{-5}$ , N=84 attack episodes in 6 animals), but  
641 investigate only increases VMHvl ( $***p=2.1263*10^{-5}$ ,  $p=0.5164$ , N=85 investigate male  
642 episodes in 7 animals, one sample ttest). Comparison between behaviors, VMHvl:  
643  $***p=5.157*10^{-4}$ , VMHvl-IPAG:  $p=0.4201$ ). IPAG responses are significantly different between  
644 attack and investigate, while VMHvl responses are not (VMHvl:  $p=0.1467$ , IPAG:  
645  $***p=5.7677*10^{-4}$ , N=84 attack episodes, N=85 investigate male episodes in N=7 animals,  
646 unpaired ttest).

647  
648 Supplementary Figure 5. Comparison of forward (VMHvl  $\rightarrow$  IPAG) and reverse (IPAG  $\rightarrow$   
649 VMHvl) regressive models. Model fit percentages and model time for fits during male (A) and  
650 female (B) interactions. Black traces (A-B) show reverse models. During male interactions  
651 (blue), fits are significantly increased in forward model relative to reverse model ( $*p<0.05$ , paired  
652 t-test for each time bin).

653

654 Supplementary Movie 1. Pharmacological inactivation of the PAG using muscimol results in  
655 aggression-specific deficits. Example intermale aggression following saline infusion, compared  
656 with behavior following muscimol inactivation. During inactivation, intermale aggression is  
657 decreased while investigatory behaviors and other social behaviors are unchanged.

658

659 Supplementary Movie 2. Example of single IPAG neuron recorded simultaneously with EMG in  
660 the superficial masseter muscle of the jaw with corresponding behavior. IPAG neuron (bottom  
661 trace) shows time-locked spiking with EMG peaks (top trace).

662

### 663 **Author contributions**

664 ALF designed and carried out *in vivo* physiology and photometry experiments, performed all  
665 analysis and modeling for these experiments, and wrote the manuscript. DW conducted slice  
666 physiology experiments, analyzed the data and co-wrote the manuscript. AS assisted with PRV  
667 tracing experiments, LWW and IZC performed pharmacological inactivation experiments. JEF  
668 constructed microdrives associated with *in vivo* physiology experiments. DL conceived the  
669 project, suggested experiments, analyzed data and edited the manuscript.

670

### 671 **Declaration of interest**

672 The authors declare no competing interests.

673

674

### 675 **References**

- 676 Davidson, A.G., O'Dell, R., Chan, V., and Schieber, M.H. (2007). Comparing effects in spike-  
677 triggered averages of rectified EMG across different behaviors. *J. Neurosci. Methods* 163, 283–  
678 294.
- 679 Evans, D.A., Stempel, A.V., Vale, R., Rühle, S., Lefler, Y., and Branco, T. (2018). A synaptic  
680 threshold mechanism for computing escape decisions. *Nature* 558, 590–594.
- 681 Falkner, A.L., Dollar, P., Perona, P., Anderson, D.J., and Lin, D. (2014). Decoding ventromedial  
682 hypothalamic neural activity during male mouse aggression. *J. Neurosci.* 34, 5971–5984.

- 683 Falkner, A.L., Grosenick, L., Davidson, T.J., Deisseroth, K., and Lin, D. (2016). Hypothalamic  
684 control of male aggression-seeking behavior. *Nat. Neurosci.* 19, 596–604.
- 685 Fang, Y.-Y., Yamaguchi, T., Song, S.C., Tritsch, N.X., and Lin, D. (2018). A Hypothalamic  
686 Midbrain Pathway Essential for Driving Maternal Behaviors. *Neuron* 98, 192–207.e10.
- 687 Fay, R.A., and Norgren, R. (1997). Identification of rat brainstem multisynaptic connections to  
688 the oral motor nuclei using pseudorabies virus. I. Masticatory muscle motor systems. *Brain Res.*  
689 *Brain Res. Rev.* 25, 255–275.
- 690 Franklin, T.B., Silva, B.A., Perova, Z., Marrone, L., Masferrer, M.E., Zhan, Y., Kaplan, A.,  
691 Greetham, L., Verrechia, V., Halman, A., et al. (2017). Prefrontal cortical control of a brainstem  
692 social behavior circuit. *Nat. Neurosci.* 20, 260–270.
- 693 Gao, Z.-R., Chen, W.-Z., Liu, M.-Z., Chen, X.-J., Wan, L., Zhang, X.-Y., Yuan, L., Lin, J.-K.,  
694 Wang, M., Zhou, L., et al. (2018). Tac1-Expressing Neurons in the Periaqueductal Gray  
695 Facilitate the Itch-Scratching Cycle via Descending Regulation. *Neuron*.
- 696 Gregg, T.R., and Siegel, A. (2003). Differential effects of NK1 receptors in the midbrain  
697 periaqueductal gray upon defensive rage and predatory attack in the cat. *Brain Res.* 994, 55–  
698 66.
- 699 Holstege, G. (2014). The periaqueductal gray controls brainstem emotional motor systems  
700 including respiration. *Prog. Brain Res.* 209, 379–405.
- 701 Kittelberger, J.M., Land, B.R., and Bass, A.H. (2006). Midbrain periaqueductal gray and vocal  
702 patterning in a teleost fish. *J. Neurophysiol.* 96, 71–85.
- 703 Koutsikou, S., Apps, R., and Lumb, B.M. (2017). Top down control of spinal sensorimotor  
704 circuits essential for survival. *J. Physiol.* 595, 4151–4158.
- 705 Lee, H., Kim, D.-W., Remedios, R., Anthony, T.E., Chang, A., Madisen, L., Zeng, H., and  
706 Anderson, D.J. (2014). Scalable control of mounting and attack by *Esr1*<sup>+</sup> neurons in the  
707 ventromedial hypothalamus. *Nature* 509, 627–632.
- 708 Li, Y., Zeng, J., Zhang, J., Yue, C., Zhong, W., Liu, Z., Feng, Q., and Luo, M. (2018).  
709 Hypothalamic Circuits for Predation and Evasion. *Neuron* 97, 911–924.e5.
- 710 Lin, D., Boyle, M.P., Dollar, P., Lee, H., Lein, E.S., Perona, P., and Anderson, D.J. (2011).  
711 Functional identification of an aggression locus in the mouse hypothalamus. *Nature* 470, 221–  
712 226.
- 713 Remedios, R., Kennedy, A., Zelikowsky, M., Grewe, B.F., Schnitzer, M.J., and Anderson, D.J.  
714 (2017). Social behaviour shapes hypothalamic neural ensemble representations of conspecific  
715 sex. *Nature* 550, 388–392.
- 716 Schilling, D.L. WILEY SERIES IN TELECOMMUNICATIONS.
- 717 Shannon, C.E., and Weaver, W. (1964). *The mathematical theory of communication* (Urbana:  
718 University of Illinois Press).
- 719 Smith, B.N., Banfield, B.W., Smeraski, C.A., Wilcox, C.L., Dudek, F.E., Enquist, L.W., and  
720 Pickard, G.E. (2000). Pseudorabies virus expressing enhanced green fluorescent protein: A tool

- 721 for in vitro electrophysiological analysis of transsynaptically labeled neurons in identified central  
722 nervous system circuits. *Proc. Natl. Acad. Sci. U. S. A.* 97, 9264–9269.
- 723 Srivastava, K.H., Holmes, C.M., Vellema, M., Pack, A.R., Elemans, C.P.H., Nemenman, I., and  
724 Sober, S.J. (2017). Motor control by precisely timed spike patterns. *Proc. Natl. Acad. Sci. U. S.*  
725 *A.* 114, 1171–1176.
- 726 Stanek, E., 4th, Cheng, S., Takatoh, J., Han, B.-X., and Wang, F. (2014). Monosynaptic  
727 premotor circuit tracing reveals neural substrates for oro-motor coordination. *Elife* 3, e02511.
- 728 Timme, N.M., and Lapish, C. (2018). A Tutorial for Information Theory in Neuroscience. *eNeuro*  
729 5.
- 730 Wang, L., Chen, I.Z., and Lin, D. (2015). Collateral pathways from the ventromedial  
731 hypothalamus mediate defensive behaviors. *Neuron* 85, 1344–1358.
- 732 Wang, L., Talwar, V., Osakada, T., Kuang, A., Guo, Z., Yamaguchi, T., and Lin, D. (2019).  
733 Hypothalamic Control of Conspecific Self-Defense. *Cell Rep.* 26, 1747–1758.e5.
- 734 Yang, C.F., Chiang, M.C., Gray, D.C., Prabhakaran, M., Alvarado, M., Juntti, S.A., Unger, E.K.,  
735 Wells, J.A., and Shah, N.M. (2013). Sexually dimorphic neurons in the ventromedial  
736 hypothalamus govern mating in both sexes and aggression in males. *Cell* 153, 896–909.
- 737 Zalcman, S.S., and Siegel, A. (2006). The neurobiology of aggression and rage: role of  
738 cytokines. *Brain Behav. Immun.* 20, 507–514.
- 739
- 740

Figure 1

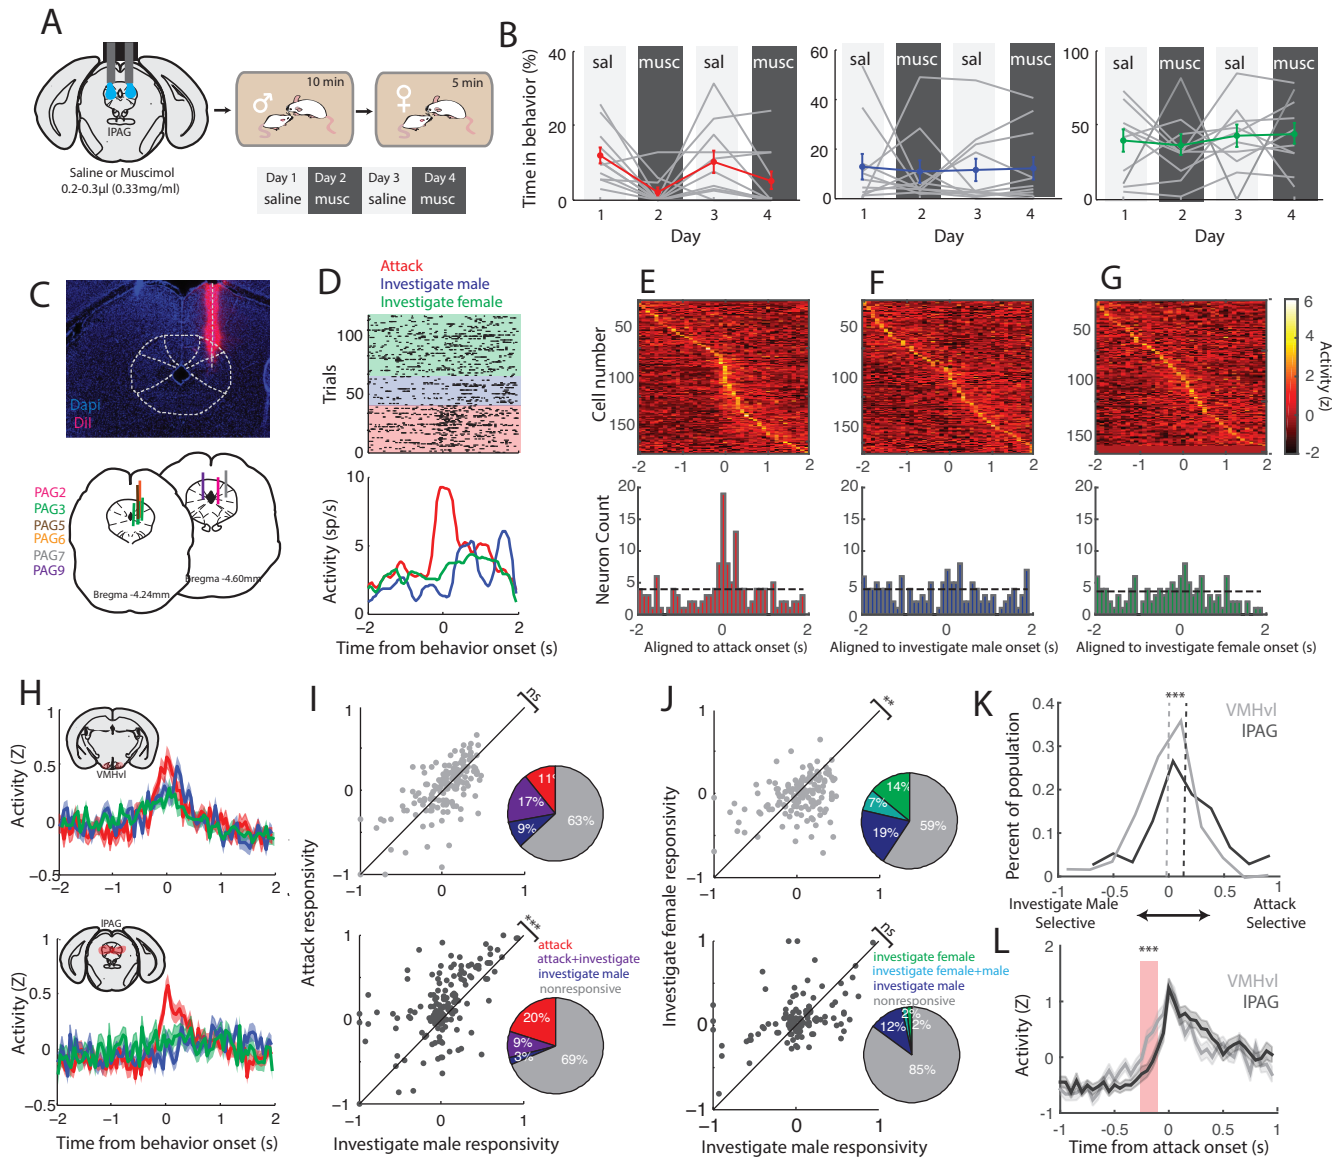

Figure 2

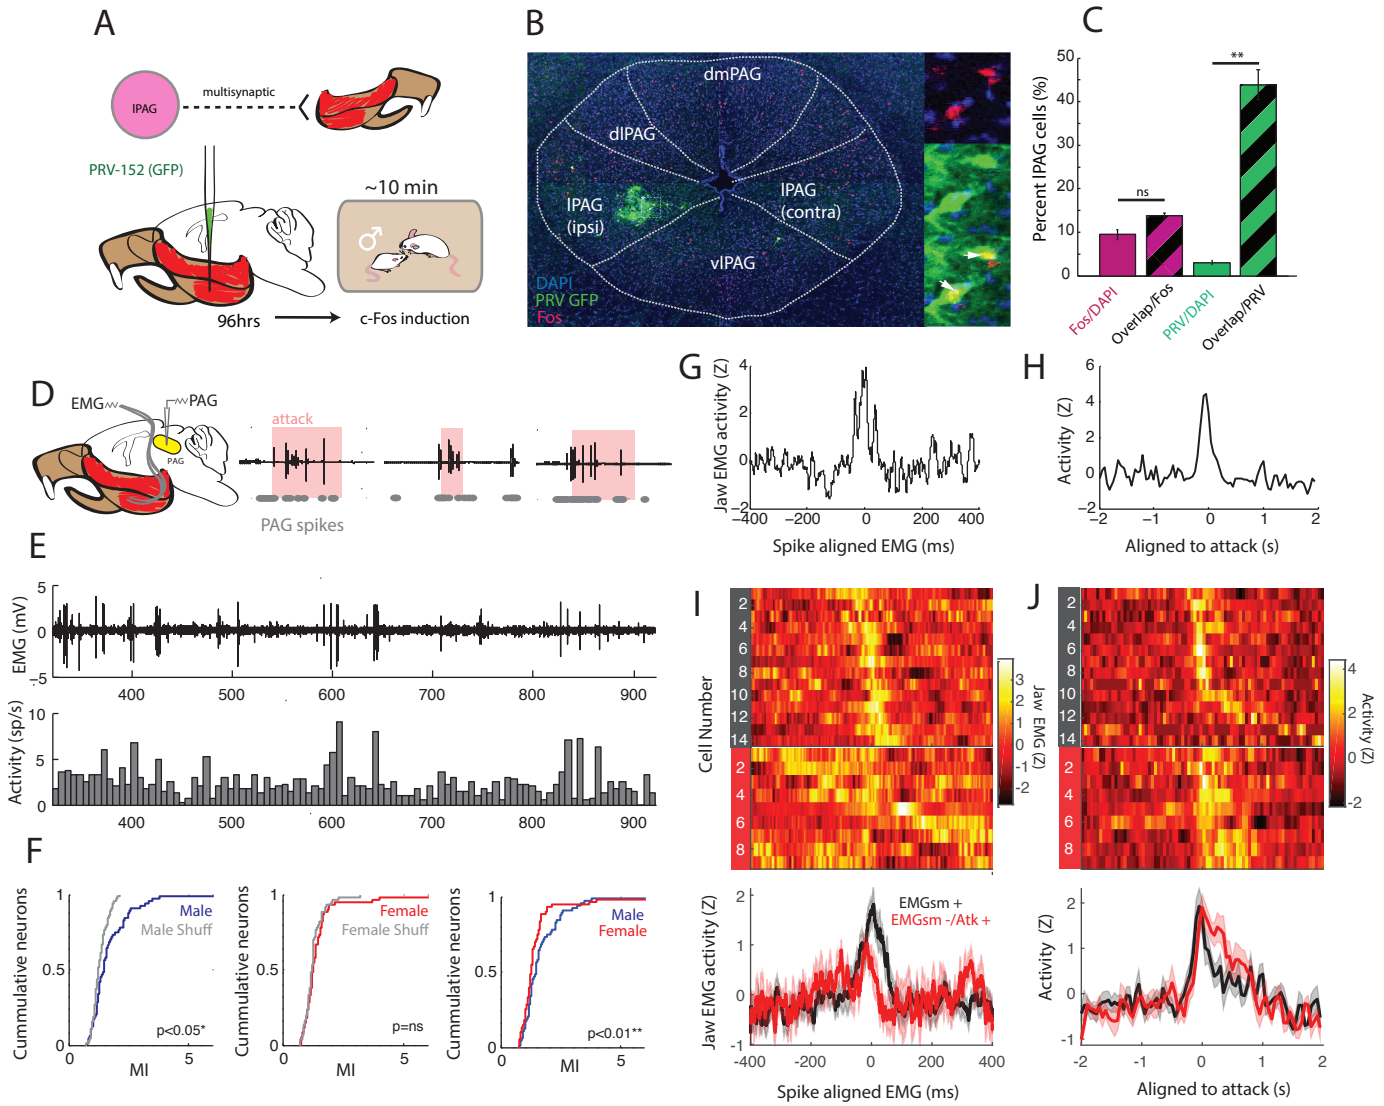



Figure 3

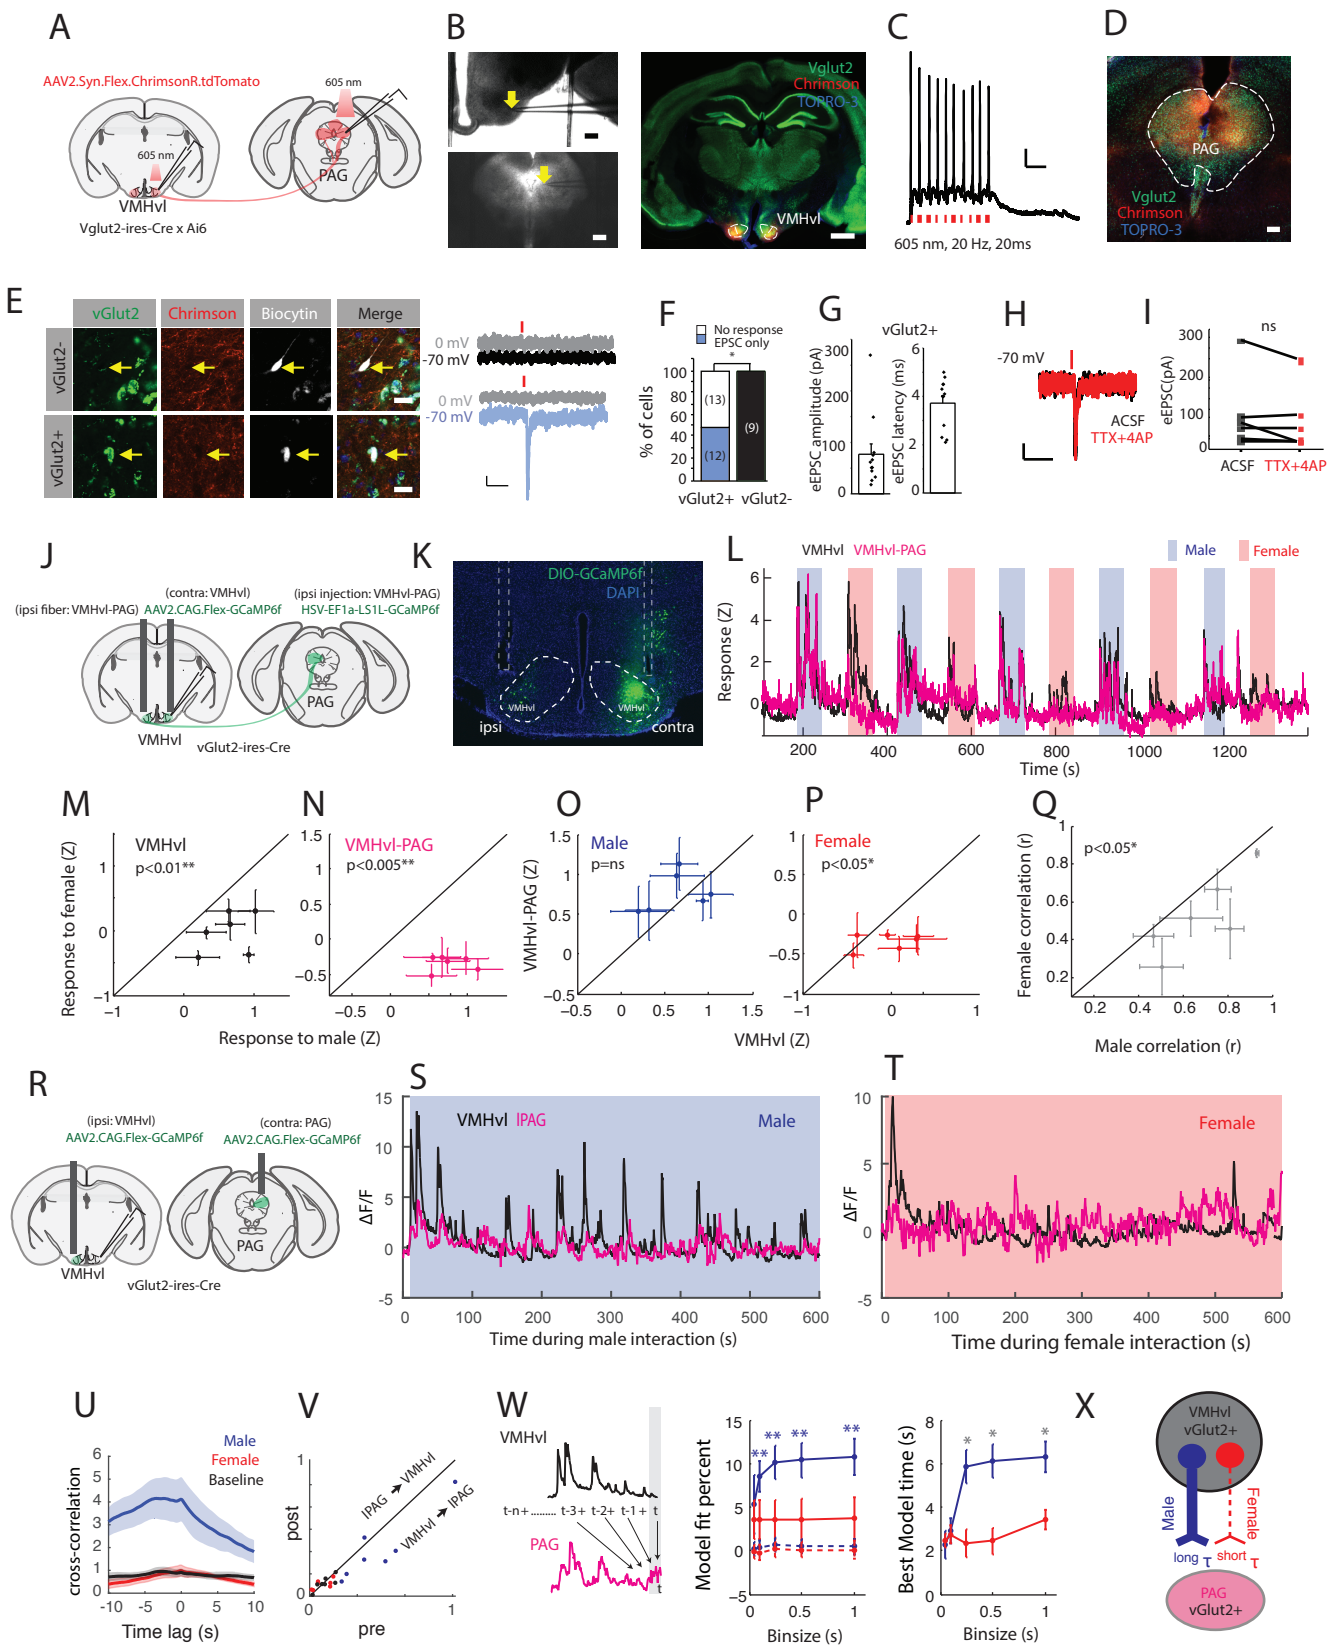

## Supplementary Figure 1

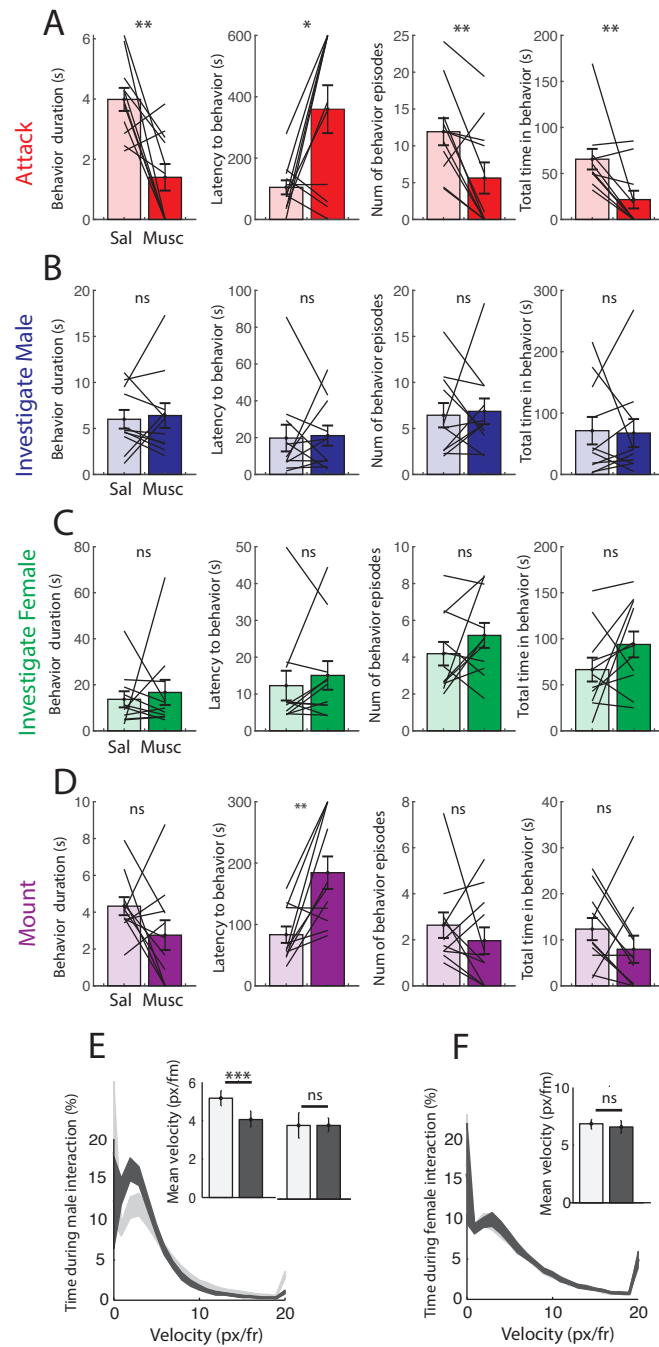

## Supplementary Figure 2

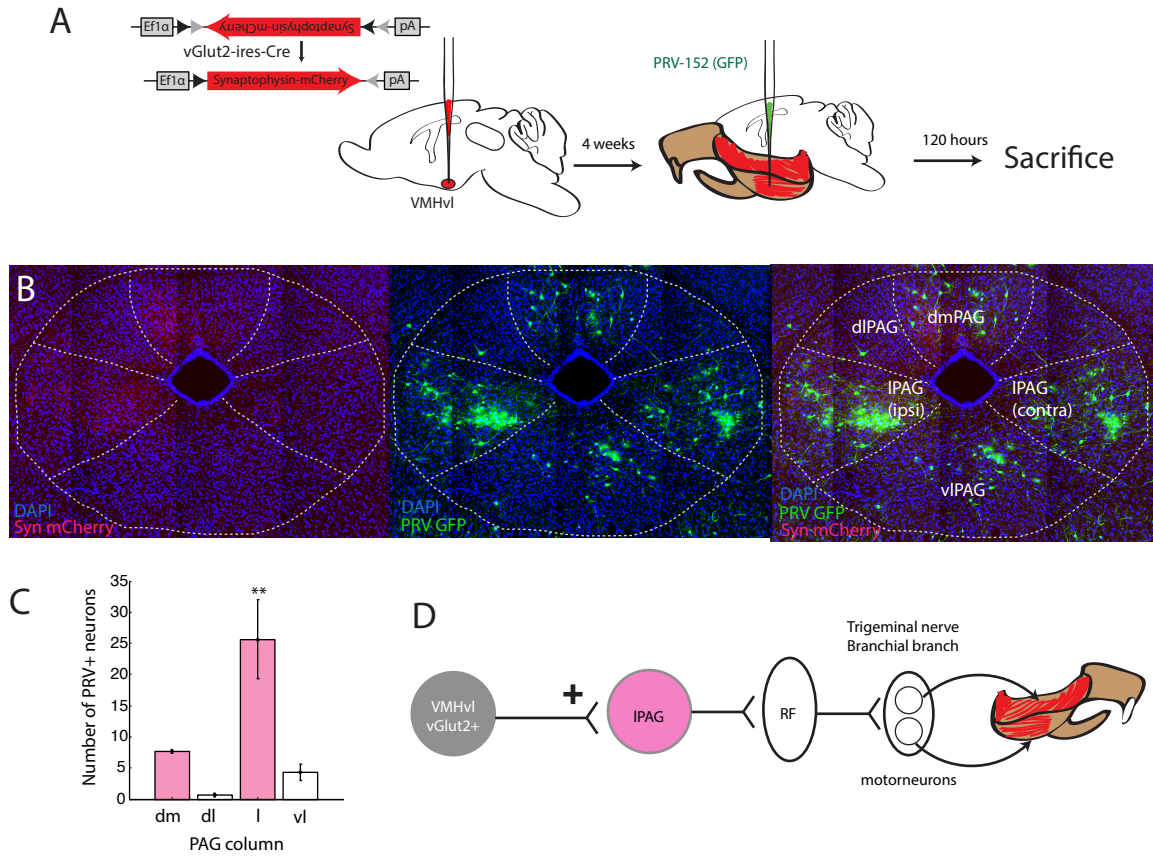

### Supplementary Figure 3

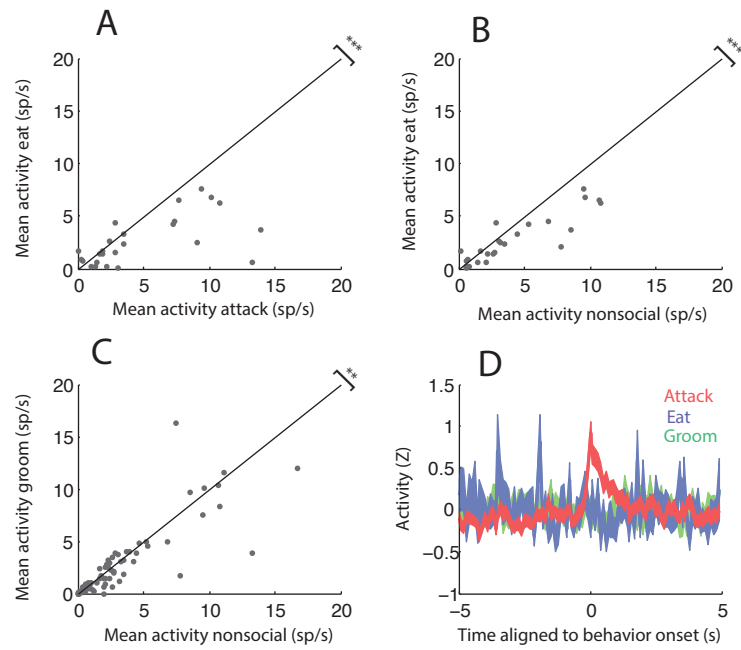

## Supplementary Figure 4

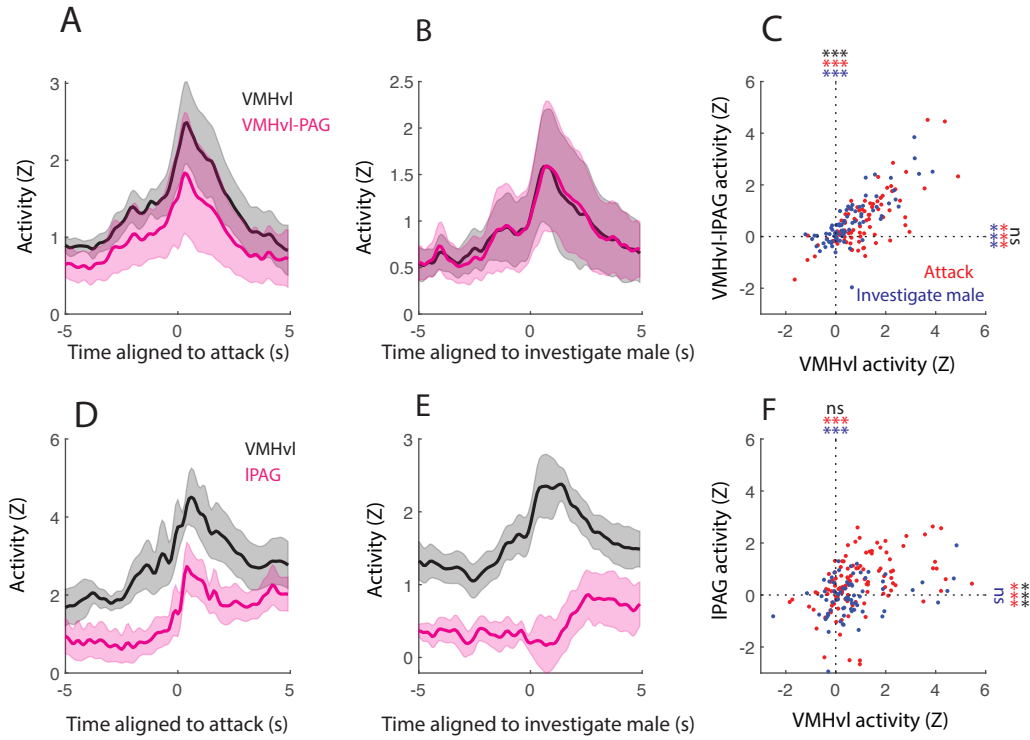

## Supplementary Figure 5

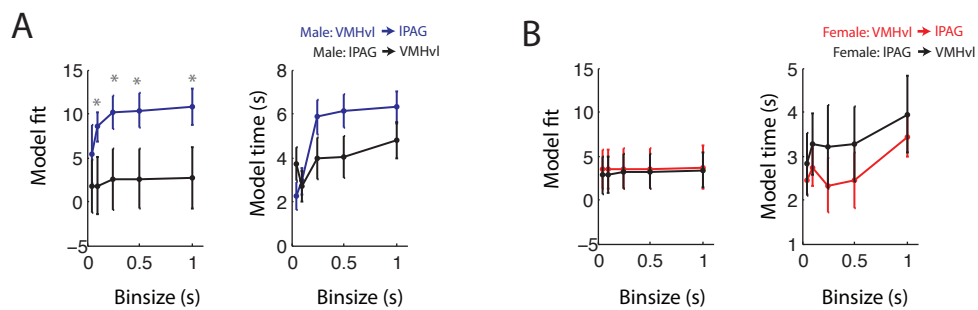

Source: https://biorxiv.org/content/biorxiv/early/2019/08/24/745067.full-text.pdf
